# Supplementary material
Source: Research Square preprint supplement (doi:10.21203/rs.3.rs-9706182/v1)
Supplement: Supplementary file 1 [file 17bc0e9ca26d750f8de95047.xlsx]

## Sheet: Sheet1
Epidemiological Dynamics of Sugar Beet Yellowing Viruses in Belgium
European Journal of Plant Pathology
Ellen A. Everaert1, Pierre Hellin2, Isabelle Stockmans3, Annelies Haegeman1, Margot Beelaert2, Louis Hautier2, Yoika Foucart1, Thomas Goedefroit1, Maaike Heyneman1, Chloé Dufrane3, André Wauters3, Stéphan Steyer2, Kris De Jonghe1
1Flanders Research Institute for Agriculture, Fisheries and Food (ILVO), Plant Sciences Unit, Merelbeke-Melle, 9820, Belgium
2Walloon Agricultural Research Center (CRA-W) - Life Sciences Department – Plant and Forest Health Unit, Rue de Liroux 2-4, Gembloux, 5030, Belgium
3Royal Belgian Institute for Beet Improvement (IRBAB-KBIVB), Tienen, 3300, Belgium
Corresponding author: E.A. Everaert; E-mail: ellen.everaert@ilvo.vlaanderen.be

## Sheet: Sheet2
Table S2 Output after Total RNA Iillumina sequencing of a BWYV-positive sugar beet sample.
Virus detected	Assigned reads	Contig size (bp)	Genome size (bp)	Mean Read Depth	Genome length coverage (%)
Beet western yellows virus (BWYV)	16429	3873	5655	2.9	68.5
Beta vulgaris mitovirus 1 (BevuMV1)	30265526	2746	2750	11021.7	99.9
Cucumber mosaic virus (CMV) RNA1	5690	1635	3101	1.8	52.7
Cucumber mosaic virus (CMV) RNA2	3128	1101	3036	1.0	36.3
Cucumber mosaic virus (CMV) RNA3	7943	1798	2220	3.6	81.0
Bell pepper alphaendornavirus (BPEV)	143319	14494	14790	9.7	98.0
Pepper mild mottle virus (PMMoV)	73054	6201	6356	11.5	97.6
Tobacco mild green mosaic virus (TMGMV)	70458	6087	6356	11.1	95.8
