# Supplementary material
Source: Research Square preprint supplement (doi:10.21203/rs.3.rs-9706182/v1)
Supplement: Supplementary file 1 [file ee564a4cdc85ee202b0c9f3d.pdf]

# Epidemiological Dynamics of Sugar Beet Yellowing Viruses in Belgium

European Journal of Plant Pathology

Ellen A. Everaert<sup>1</sup>, Pierre Hellin<sup>2</sup>, Isabelle Stockmans<sup>3</sup>, Annelies Haegeman<sup>1</sup>, Margot Beelaert<sup>2</sup>, Louis Hautier<sup>2</sup>, Yoika Foucart<sup>1</sup>, Thomas Goedefroit<sup>1</sup>, Maaïke Heyneman<sup>1</sup>, Chloé Dufrane<sup>3</sup>, André Wauters<sup>3</sup>, Stéphan Steyer<sup>2</sup>, Kris De Jonghe<sup>1</sup>

<sup>1</sup>Flanders Research Institute for Agriculture, Fisheries and Food (ILVO), Plant Sciences Unit, Merelbeke-Melle, 9820, Belgium

<sup>2</sup>Walloon Agricultural Research Center (CRA-W) - Life Sciences Department – Plant and Forest Health Unit, Rue de Liroux 2-4, Gembloux, 5030, Belgium

<sup>3</sup>Royal Belgian Institute for Beet Improvement (IRBAB-KBIVB), Tienen, 3300, Belgium

Corresponding author: E.A. Everaert; E-mail: [ellen.everaert@ilvo.vlaanderen.be](mailto:ellen.everaert@ilvo.vlaanderen.be)

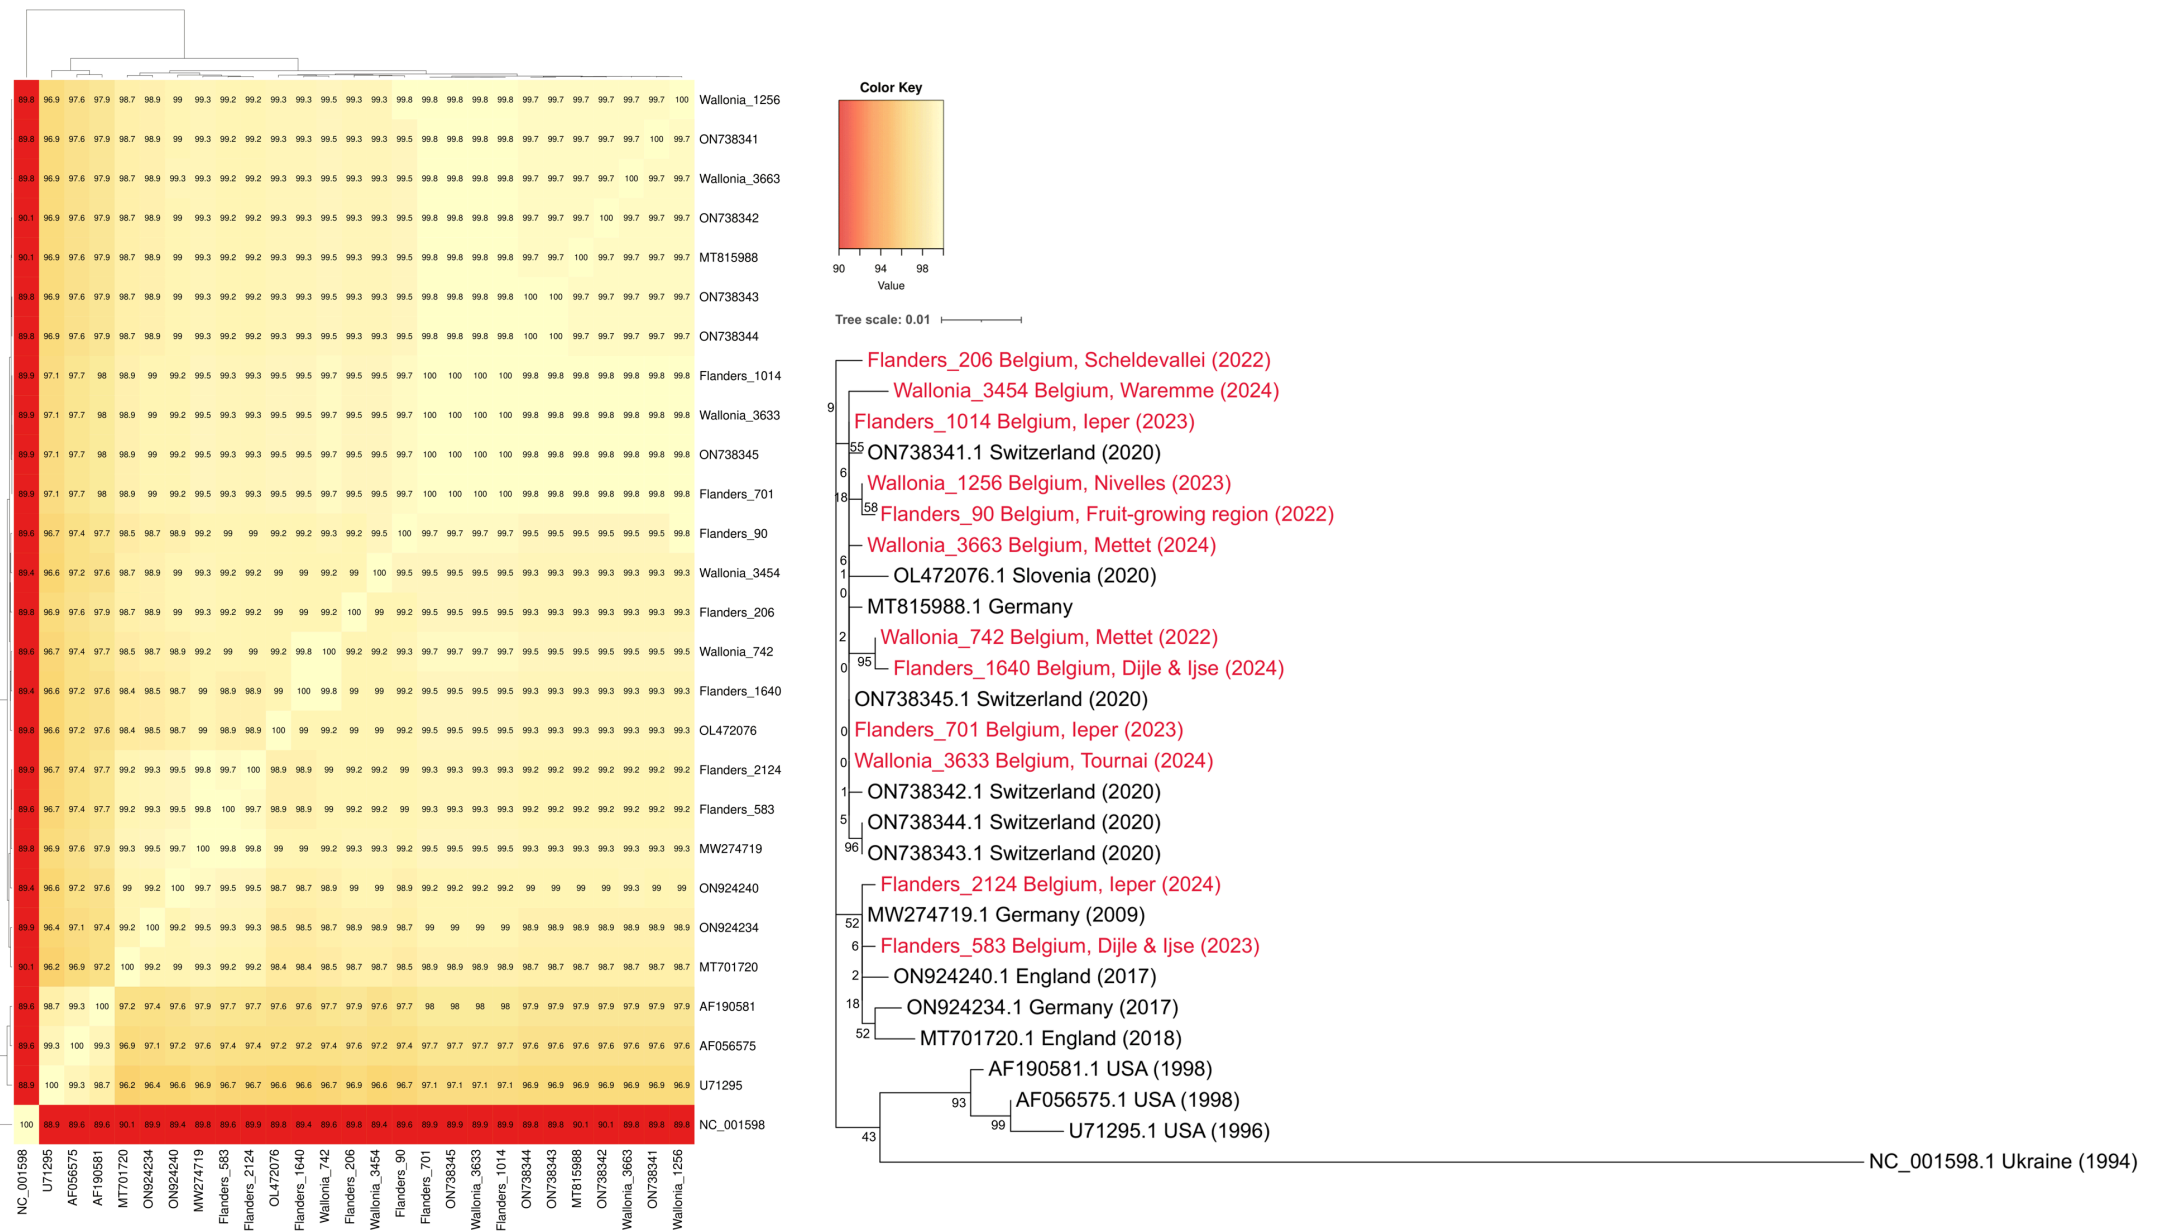

**Fig. 1** Pairwise identity matrix (left) and phylogenetic tree (right) based on coat protein (CP) sequences of Belgian beet yellows virus (BYV) isolates and isolates retrieved from public databases. Belgian isolates are highlighted in red.

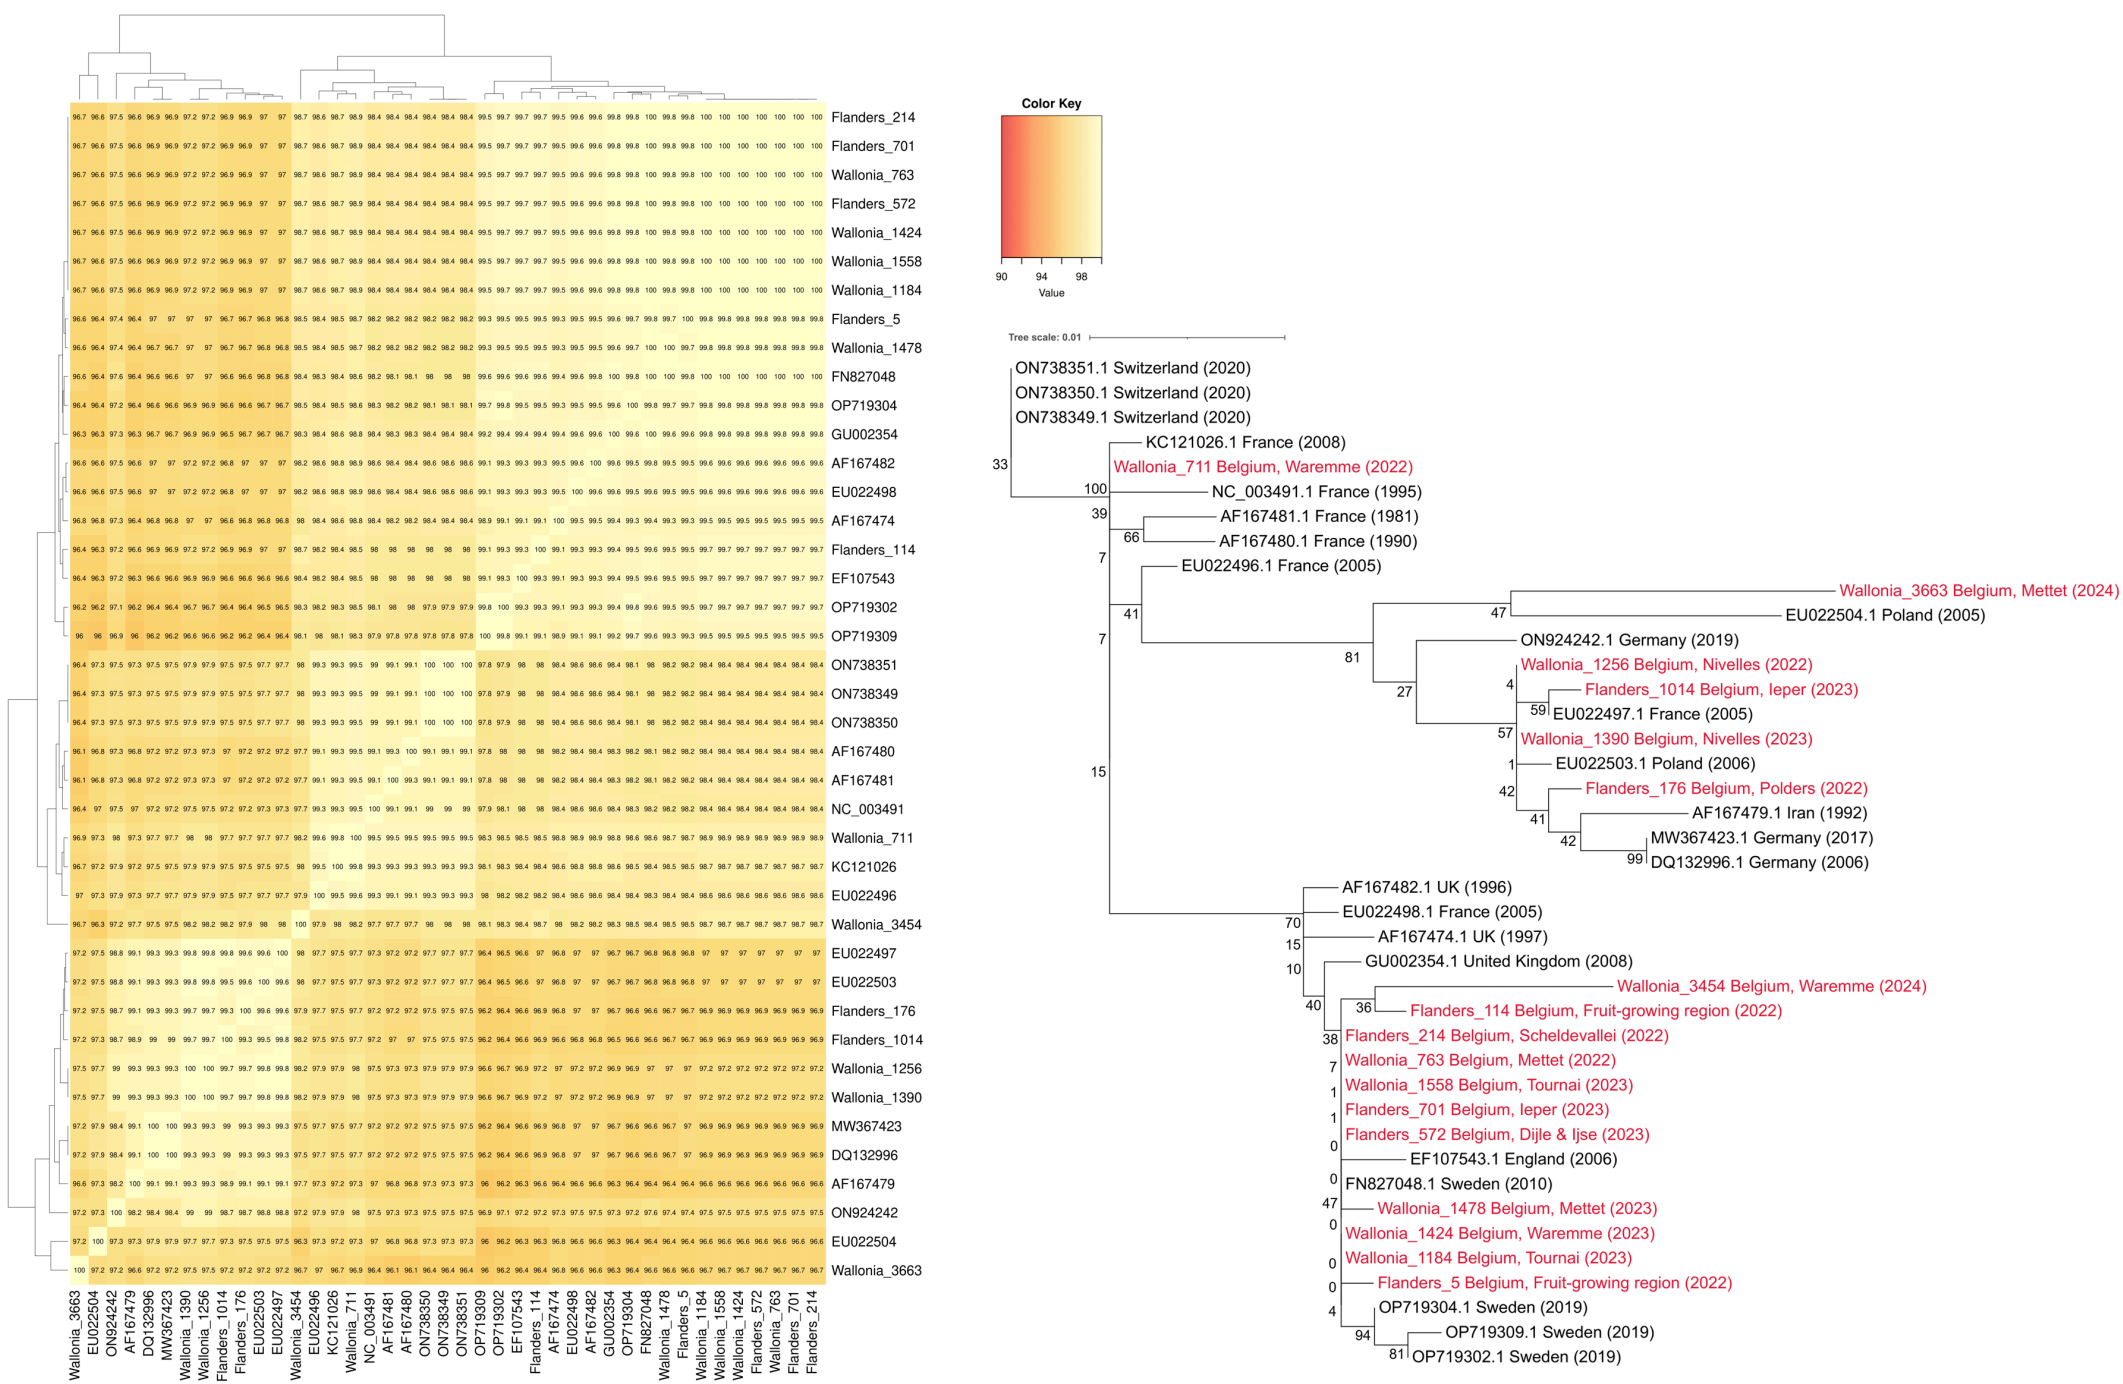

**Fig. 2** Pairwise identity matrix (left) and phylogenetic tree (right) based on coat protein (CP) sequences of Belgian beet mild yellowing virus (BMV) isolates and isolates retrieved from public databases. Belgian isolates are highlighted in red.
