# Supplementary material
Source: Research Square preprint supplement (doi:10.21203/rs.3.rs-9706182/v1)
Supplement: Supplementary file 2 [file 2122acbc752f8010c277db15.xlsx]

## Sheet: Sheet1
Epidemiological Dynamics of Sugar Beet Yellowing Viruses in Belgium
European Journal of Plant Pathology
Ellen A. Everaert1, Pierre Hellin2, Isabelle Stockmans3, Annelies Haegeman1, Margot Beelaert2, Louis Hautier2, Yoika Foucart1, Thomas Goedefroit1, Maaike Heyneman1, Chloé Dufrane3, André Wauters3, Stéphan Steyer2, Kris De Jonghe1
1Flanders Research Institute for Agriculture, Fisheries and Food (ILVO), Plant Sciences Unit, Merelbeke-Melle, 9820, Belgium
2Walloon Agricultural Research Center (CRA-W) - Life Sciences Department – Plant and Forest Health Unit, Rue de Liroux 2-4, Gembloux, 5030, Belgium
3Royal Belgian Institute for Beet Improvement (IRBAB-KBIVB), Tienen, 3300, Belgium
Corresponding author: E.A. Everaert; E-mail: ellen.everaert@ilvo.vlaanderen.be

## Sheet: Sheet2
Table S5 Overview of samples successfully sequenced using total RNA sequencing on the Illumina platform.
Sample ID	Detected viruses	Plant species	Year	Region
BChV_Aphid_Culture	BChV	Beta vulgaris	2022	Germany
Flanders_5	BMYV	Beta vulgaris	2022	Fruit-growing region
Flanders_26	BChV	Beta vulgaris	2022	Dijle and Ijse
Flanders_67	BChV	Beta vulgaris	2022	Fruit-growing region
Flanders_90	BYV	Beta vulgaris	2022	Fruit-growing region
Flanders_114	BMYV	Beta vulgaris	2022	Fruit-growing region
Flanders_157	BChV	Beta vulgaris	2022	Polders
Flanders_176	BMYV	Beta vulgaris	2022	Polders
Flanders_206	BYV	Beta vulgaris	2022	Scheldevallei
Flanders_214	BMYV	Beta vulgaris	2022	Scheldevallei
Flanders_453	BChV	Beta vulgaris	2023	Fruit-growing region
Flanders_461	BChV	Beta vulgaris	2023	Fruit-growing region
Flanders_572	BMYV	Beta vulgaris	2023	Dijle and Ijse
Flanders_583	BYV	Beta vulgaris	2023	Dijle and Ijse
Flanders_708	BMYV, BYV	Ranunculus sardous	2023	Ieper
Flanders_1014	BMYV, BYV	Beta vulgaris	2023	Ieper
Flanders_1640	BYV	Beta vulgaris	2024	Dijle and Ijse
Flanders_1926	BChV	Beta vulgaris	2024	Fruit-growing region
Flanders_2124	BChV, BYV	Beta vulgaris	2024	Ieper
Wallonia_711	BMYV	Beta vulgaris	2022	Waremme
Wallonia_742	BYV	Beta vulgaris	2022	Mettet
Wallonia_763	BMYV	Beta vulgaris	2022	Mettet
Wallonia_1184	BMYV	Beta vulgaris	2023	Tournai
Wallonia_1256	BMYV, BYV	Beta vulgaris	2023	Nivelles
Wallonia_1390	BChV, BMYV	Beta vulgaris	2023	Nivelles
Wallonia_1424	BMYV	Beta vulgaris	2023	Waremme
Wallonia_1478	BChV, BMYV	Beta vulgaris	2023	Mettet
Wallonia_1558	BChV, BMYV	Beta vulgaris	2023	Tournai
Wallonia_3454	BChV, BMYV, BYV	Beta vulgaris	2024	Waremme
Wallonia_3633	BChV, BYV	Beta vulgaris	2024	Tournai
Wallonia_3663	BMYV, BYV	Beta vulgaris	2024	Mettet
