# Supplementary material
Source: Research Square preprint supplement (doi:10.21203/rs.3.rs-9706182/v1)
Supplement: Supplementary file 3 [file 51fb5105bcc19453749eea34.xlsx]

## Sheet: Sheet1
Epidemiological Dynamics of Sugar Beet Yellowing Viruses in Belgium
European Journal of Plant Pathology
Ellen A. Everaert1, Pierre Hellin2, Isabelle Stockmans3, Annelies Haegeman1, Margot Beelaert2, Louis Hautier2, Yoika Foucart1, Thomas Goedefroit1, Maaike Heyneman1, Chloé Dufrane3, André Wauters3, Stéphan Steyer2, Kris De Jonghe1
1Flanders Research Institute for Agriculture, Fisheries and Food (ILVO), Plant Sciences Unit, Merelbeke-Melle, 9820, Belgium
2Walloon Agricultural Research Center (CRA-W) - Life Sciences Department – Plant and Forest Health Unit, Rue de Liroux 2-4, Gembloux, 5030, Belgium
3Royal Belgian Institute for Beet Improvement (IRBAB-KBIVB), Tienen, 3300, Belgium
Corresponding author: E.A. Everaert; E-mail: ellen.everaert@ilvo.vlaanderen.be

## Sheet: Sheet2
Table S3a Regional viral incidence rates (%).
Region	Infected samples	Total samples	Viral incidence rate (%)
Tournai	89	97	91.8
Waremme	79	90	87.8
Nivelles	69	96	71.9
Mettet	61	89	68.5
Fruit-growing region	104	155	67.1
Scheldevallei	47	70	67.1
Pajottenland	20	30	66.7
Ieper	33	59	55.9
Polders	54	105	51.4
Dijle and Ijse	39	80	48.8
Table S3b Statistical analysis on regional differences in viral incidence rates based on pairwise comparisons using pairwise comparison of proportions (p-values)
	Tournai	Waremme	Nivelles	Mettet	Fruit-growing region	Scheldevallei	Pajottenland	Ieper	Polders
Waremme	0.67859	-	-	-	-	-	-	-
Nivelles	0.00279	0.03050	-	-	-	-	-	-
Mettet	0.00068	0.00996	0.88953	-	-	-	-	-
Fruit-growing region	0.00010	0.00265	0.67859	1.00000	-	-	-	-
Scheldevallei	0.00068	0.00956	0.80703	1.00000	1.00000	-	-	-
Pajottenland	0.00626	0.03937	0.88953	1.00000	1.00000	1.00000	-	-
Ieper	3.9e-06	0.00017	0.11388	0.27647	0.27871	0.39096	0.66063
Polders	1.8e-08	1.5e-06	0.01324	0.04741	0.03595	0.10639	0.31612	0.86918
Dijle and Ijse	1.8e-08	1.4e-06	0.00956	0.03322	0.02544	0.06875	0.24804	0.67859	0.95960
P value adjustment method: BH
