# Supplementary material
Source: Research Square preprint supplement (doi:10.21203/rs.3.rs-9706182/v1)
Supplement: Supplementary file 4 [file 9f96485fae6132344e78ba62.xlsx]

## Sheet: Sheet1
Epidemiological Dynamics of Sugar Beet Yellowing Viruses in Belgium
European Journal of Plant Pathology
Ellen A. Everaert1, Pierre Hellin2, Isabelle Stockmans3, Annelies Haegeman1, Margot Beelaert2, Louis Hautier2, Yoika Foucart1, Thomas Goedefroit1, Maaike Heyneman1, Chloé Dufrane3, André Wauters3, Stéphan Steyer2, Kris De Jonghe1
1Flanders Research Institute for Agriculture, Fisheries and Food (ILVO), Plant Sciences Unit, Merelbeke-Melle, 9820, Belgium
2Walloon Agricultural Research Center (CRA-W) - Life Sciences Department – Plant and Forest Health Unit, Rue de Liroux 2-4, Gembloux, 5030, Belgium
3Royal Belgian Institute for Beet Improvement (IRBAB-KBIVB), Tienen, 3300, Belgium
Corresponding author: E.A. Everaert; E-mail: ellen.everaert@ilvo.vlaanderen.be

## Sheet: Sheet2
Table S4 Comprehensive list of wild plant species screened for sugar beet yellowing viruses, using a pooled sampling methodology (three plants per species) in the Flanders (2022–2024) survey and individual plant sampling in the Wallonia (2022–2024) survey
Plant species	Region	Total Samples Tested
Aethusa cynapium	Flanders	3
Anthriscus sylvestris	Flanders	1
Arrhenatherum elatius	Flanders	1
Artemisia vulgaris	Flanders	8
Avena sativa	Flanders	1
Bellis perennis	Flanders	1
Brassica nigra	Flanders	1
Capsella bursa-pastoris	Flanders	1
Carduus acanthoides	Flanders	1
Centaurea cyanus	Flanders	1
Centaurea jacea	Flanders	2
Chenopodium album	Flanders	30
Cichorium intybus	Flanders	1
Cirsium arvense	Flanders	21
Conium maculatum	Flanders	2
Convolvulus arvensis	Flanders	5
Datura stramonium	Flanders	1
Digitalis purpurea	Flanders	1
Echinochloa crus-galli	Flanders	3
Epilobium hirsutum	Flanders	2
Epilobium sp.	Flanders	2
Epilobium tetragonum	Flanders	1
Equisetum arvense	Flanders	1
Erigeron canadensis	Flanders	2
Galinsoga parviflora	Flanders	2
Galinsoga quadriradiata	Flanders	1
Galium aparine	Flanders	1
Geranium dissectum	Flanders	2
Heracleum mantegazzianum	Flanders	1
Hieracium laevigatum	Flanders	1
Jacobaea vulgaris	Flanders	2
Lamium album	Flanders	1
Lamium purpureum	Flanders	1
Lapsana communis	Flanders	2
Lipandra polysperma	Flanders	2
Lythrum salicaria	Flanders	2
Matricaria chamomilla	Flanders	16
Medicago sativa	Flanders	1
Mercurialis annua	Flanders	6
Papaver rhoeas	Flanders	1
Persicaria amphibia	Flanders	2
Persicaria maculosa	Flanders	7
Plantago lanceolata	Flanders	5
Plantago major	Flanders	5
Poa annua	Flanders	1
Polygonum aviculare	Flanders	5
Ranunculus acris	Flanders	1
Ranunculus sardous	Flanders	1
Rorippa palustris	Flanders	1
Rubus sp.	Flanders	2
Rumex obtusifolius	Flanders	3
Senecio vulgaris	Flanders	9
Sinapis arvensis	Flanders	2
Sonchus arvensis	Flanders	8
Sonchus asper	Flanders	1
Stellaria media	Flanders	1
Symphytum officinale	Flanders	3
Tanacetum vulgare	Flanders	3
Trifolium pratense	Flanders	1
Urtica dioica	Flanders	8
Veronica	Flanders	1
Viburnum sp.	Flanders	1
Vicia sativa	Flanders	1
Vicia sp.	Flanders	1
Vicia villosa	Flanders	1
Achillea millefolium	Wallonia	21
Aethusa cynapium	Wallonia	7
Alliaria petiolata	Wallonia	2
Amaranthus albus	Wallonia	1
Amaranthus blitum	Wallonia	5
Amaranthus hybridus	Wallonia	8
Amaranthus retroflexus	Wallonia	2
Amaranthus sp.	Wallonia	5
Anthemis cotula	Wallonia	1
Anthriscus sp.	Wallonia	14
Anthriscus sylvestris	Wallonia	1
Arabidopsis thaliana	Wallonia	2
Arctium lappa	Wallonia	2
Artemisia verlotiorum	Wallonia	1
Artemisia vulgaris	Wallonia	66
Asteraceae sp.	Wallonia	4
Atriplex patula	Wallonia	22
Atriplex prostrata	Wallonia	2
Bellis perennis	Wallonia	4
Bellis sylvestris	Wallonia	1
Beta vulgaris	Wallonia	24
Bidens tripartita	Wallonia	1
Brassica juncea	Wallonia	1
Brassica napus	Wallonia	28
Brassica nigra	Wallonia	1
Brassicaceae inconnu	Wallonia	2
Capsella bursa-pastoris	Wallonia	10
Cardamine hirsuta	Wallonia	25
Carduus acanthoides	Wallonia	1
Carduus pycnocephalus	Wallonia	4
Carduus sp.	Wallonia	5
Centaurea cyanus	Wallonia	1
Centaurea nigra	Wallonia	7
Centaurea sp.	Wallonia	7
Cerastium glomeratum	Wallonia	13
Cerastium sp.	Wallonia	5
Chaerophyllum temulum	Wallonia	1
Chelidonium majus	Wallonia	3
Chelidonium majus	Wallonia	1
Chenopodium album	Wallonia	87
Chenopodium berlandieri	Wallonia	4
Chenopodium ficifolium	Wallonia	8
Cichorium intybus	Wallonia	5
Cirsium arvense	Wallonia	24
Cirsium sp.	Wallonia	15
Cirsium vulgare	Wallonia	5
Conium maculatum	Wallonia	1
Convolvulus arvensis	Wallonia	35
Convolvulus sepium	Wallonia	13
Crepis sp.	Wallonia	6
Cruciata laevipes	Wallonia	1
Datura stramonium	Wallonia	1
Daucus carota	Wallonia	9
Dipsacus fullonum	Wallonia	1
Epilobium collinum	Wallonia	1
Epilobium hirsutum	Wallonia	3
Epilobium parviflorum	Wallonia	5
Epilobium sp.	Wallonia	3
Epilobium tetragonum	Wallonia	7
Equisetum arvense	Wallonia	23
Erigeron canadensis	Wallonia	2
Erigeron sp.	Wallonia	3
Erodium sp.	Wallonia	2
Euphorbia helioscopia	Wallonia	3
Euphorbia sp.	Wallonia	3
Fallopia convolvulus	Wallonia	14
Fumaria officinalis	Wallonia	2
Galinsoga parviflora	Wallonia	2
Galium album	Wallonia	2
Galium aparine	Wallonia	39
Geranium columbinum	Wallonia	1
Geranium dissectum	Wallonia	20
Geranium pusillum	Wallonia	13
Geranium pyrenaicum	Wallonia	1
Geranium rotundifolium	Wallonia	41
Geranium sp.	Wallonia	11
Geum sp.	Wallonia	2
Glebionis segetum	Wallonia	1
Glechoma hederacea	Wallonia	6
Helianthus annuus	Wallonia	1
Helminthotheca echioides	Wallonia	1
Heracleum sphondylium	Wallonia	54
Hypericum sp.	Wallonia	1
Hypochaeris sp.	Wallonia	2
Lactuca serriola	Wallonia	9
Lamium album	Wallonia	6
Lamium amplexicaule	Wallonia	4
Lamium purpureum	Wallonia	32
Lamium sp.	Wallonia	3
Lapsana communis	Wallonia	15
Lathyrus tuberosus	Wallonia	2
Lepidium didymum	Wallonia	2
Leucanthemum sp.	Wallonia	3
Linum usitatissimum	Wallonia	3
Lipandra polysperma	Wallonia	1
Lysimachia arvensis	Wallonia	7
Lythrum salicaria	Wallonia	1
Malva pusilla	Wallonia	3
Matricaria chamomilla	Wallonia	87
Medicago sativa	Wallonia	3
Medicago sp.	Wallonia	1
Melissa officinalis	Wallonia	1
Mentha aquatica	Wallonia	1
Mercurialis annua	Wallonia	58
Myosotis arvensis	Wallonia	1
Papaver rhoeas	Wallonia	23
Papaver sp.	Wallonia	1
Persicaria amphibia	Wallonia	1
Persicaria lapathifolia	Wallonia	5
Persicaria maculosa	Wallonia	20
Persicaria minor	Wallonia	1
Phacelia tanacetifolia	Wallonia	11
Picris hieracioides	Wallonia	2
Pisum sativum	Wallonia	1
Plantago coronopus	Wallonia	1
Plantago lanceolata	Wallonia	26
Plantago major	Wallonia	37
Polygonum aviculare	Wallonia	58
Prunella vulgaris	Wallonia	1
Prunus avium	Wallonia	4
Prunus domestica	Wallonia	1
Prunus dulcis	Wallonia	1
Prunus persica	Wallonia	1
Pulicaria dysenterica	Wallonia	2
Ranunculus acris	Wallonia	1
Ranunculus repens	Wallonia	19
Ranunculus sp.	Wallonia	2
Raphanus raphanistrum	Wallonia	5
Raphanus sativus	Wallonia	5
Raphanus sp.	Wallonia	1
Rorippa sylvestris	Wallonia	1
Rubus fruticosus	Wallonia	6
Rubus sp.	Wallonia	6
Rumex acetosa	Wallonia	2
Rumex crispus	Wallonia	4
Rumex obtusifolius	Wallonia	14
Rumex sp.	Wallonia	4
Saponaria officinalis	Wallonia	1
Scandix pecten-veneris	Wallonia	3
Scrophularia sp.	Wallonia	1
Senecio squalidus	Wallonia	1
Senecio vulgaris	Wallonia	24
Silene sp.	Wallonia	3
Sinapis alba	Wallonia	1
Sinapis arvensis	Wallonia	23
Sinapis sp.	Wallonia	2
Sisymbrium officinale	Wallonia	5
Solanum nigrum	Wallonia	11
Solanum tuberosum	Wallonia	4
Sonchus arvensis	Wallonia	20
Sonchus asper	Wallonia	32
Sonchus oleraceus	Wallonia	10
Sonchus palustris	Wallonia	4
Sonchus sp.	Wallonia	6
Stellaria media	Wallonia	27
Symphytum officinale	Wallonia	10
Tanacetum vulgare	Wallonia	3
Taraxacum officinale	Wallonia	37
Taraxacum sp.	Wallonia	26
Thlaspi arvense	Wallonia	1
Trifolium angustifolium	Wallonia	1
Trifolium hybridum	Wallonia	2
Trifolium repens	Wallonia	6
Trifolium sp.	Wallonia	17
Tripleurospermum inodorum	Wallonia	3
Urtica dioica	Wallonia	91
Urtica urens	Wallonia	31
Valerianella locusta	Wallonia	1
Veronica agrestis	Wallonia	1
Veronica arvensis	Wallonia	7
Veronica hederifolia	Wallonia	4
Veronica persica	Wallonia	48
Veronica polita	Wallonia	5
Veronica sp.	Wallonia	17
Vicia sativa	Wallonia	2
Vicia sp.	Wallonia	5
Viola arvensis	Wallonia	15
