# Supplementary material
Source: Research Square preprint supplement (doi:10.21203/rs.3.rs-9706182/v1)
Supplement: Supplementary file 5 [file dc0b4461327f4b1cd0413abe.xlsx]

## Sheet: Sheet1
Epidemiological Dynamics of Sugar Beet Yellowing Viruses in Belgium
European Journal of Plant Pathology
Ellen A. Everaert1, Pierre Hellin2, Isabelle Stockmans3, Annelies Haegeman1, Margot Beelaert2, Louis Hautier2, Yoika Foucart1, Thomas Goedefroit1, Maaike Heyneman1, Chloé Dufrane3, André Wauters3, Stéphan Steyer2, Kris De Jonghe1
1Flanders Research Institute for Agriculture, Fisheries and Food (ILVO), Plant Sciences Unit, Merelbeke-Melle, 9820, Belgium
2Walloon Agricultural Research Center (CRA-W) - Life Sciences Department – Plant and Forest Health Unit, Rue de Liroux 2-4, Gembloux, 5030, Belgium
3Royal Belgian Institute for Beet Improvement (IRBAB-KBIVB), Tienen, 3300, Belgium
Corresponding author: E.A. Everaert; E-mail: ellen.everaert@ilvo.vlaanderen.be

## Sheet: Sheet2
Table S1 Overview of the sampling strategy in the Flanders and Wallonia survey
Parameter	Flanders Survey	Wallonia Survey
Study Period	2022-2024	2022-2024
Locations	10 annual locations	32 annual locations +4 additional location in 2024 on experimental platforms for aphid sampling
Sampling Timepoints	T1: aphid appearance (aphids) T2: 4–6 weeks post-aphid appearance (aphids, plants) T3: end of the sugar beet growing season (plants) In 2022, sampling was restricted to the end of the season	Sugar beet sampling was conducted at a single timepoint towards the end of the growing season (2023-2024). Wild plants were sampled twice: once in autumn and subsequently in the following spring (2022-2024). Aphids were sampled weekly, from beet emergence until row closure (2024).
Sugar Beet Sampling Strategy	15–20 individual plants per location were sampled based on symptom appearance, with two leaves collected per plant (2022-2024). Mildly symptomatic or asymptomatic plants were sampled in fields exhibiting lower disease pressure.	Six symptomatic and six asymptomatic plants were sampled per location, with three leaves collected per plant (2023-2024).
Wild Plant Sampling Strategy	3–5 samples of surrounding vegetation were collected per location (2022-2024). Samples consisted of leaves pooled from three plants of the identical species.	Wild plants were surveyed over thee three-year period (2022-2024). Plants were tested individually rather than pooled.
Aphid Sampling Strategy	Targeted 20 individuals per location (10–15 from sugar beet, 5–10 from surrounding vegetation). Collection methods utilized direct manual suction, yellow sticky plates and leaf-applied glue (2023-2024).	Four yellow sticky traps were placed at each location and exchanged weekly. Manual sampling was performed on 40 sugar beet plants (2024).
Total Samples Analyzed	798 sugar beet plants 209 pooled wild plant samples 805 aphids	735 sugar beet plants 1816 wild plants 700 aphids
